# Supplementary material for: Knockdown of ghAlba_4 and ghAlba_5 Proteins in Cotton Inhibits Root Growth and Increases Sensitivity to Drought and Salt Stresses
Source: Front Plant Sci. 2019 Oct 15;10:1292. doi: 10.3389/fpls.2019.01292 (PMC6804553; doi:10.3389/fpls.2019.01292)
Supplement: Table S5 — RNA sequence data for the upland cotton Alba genes profiled under drought and salt stress conditions. [file Table_5.xlsx]

## Sheet: drought
Table S5: RNA sequence data for the upland cotton Alba genes profiled under drought stress conditions
	CK	Lf PEG 1h	Lf PEG 3h	Lf PEG 6h	Lf PEG 12h	St PEG 1h	St PEG 3h	St PEG 6h	St PEG 12h	Rt PEG 1h	Rt PEG 3h	Rt PEG 6h	Rt PEG 12h
Gh_D05G0083	0	3.33199	3.78346	0	3.53854	4.07639	3.87381	4.26003	3.853	4.34127	2.80323	3.12102	4.33271
Gh_D08G2460	0	4.42425	4.98959	5.04876	4.46597	4.73173	4.75542	4.07724	4.62702	4.4957	3.73118	3.94767	5.44956
Gh_D01G0922	0	4.34341	4.8485	5.1014	4.61941	5.98504	4.83845	5.27463	4.55827	5.94322	5.01881	4.90207	5.0268
Gh_A01G0884	0	3.78031	4.22188	4.91886	4.74524	5.69404	4.80116	4.97728	4.59694	5.54102	4.64039	4.57954	4.62644
Gh_D03G0593	0	2.91073	4.29278	4.44294	4.45943	3.07382	3.37851	4.29646	3.82782	4.05832	3.50716	4.31542	4.06005
Gh_D13G2120	0	4.79494	4.95327	5.52795	3.84398	4.48091	3.98277	4.38681	4.43763	5.24451	4.72683	4.0798	5.1375
Gh_A08G2091	0	3.73552	3.64616	4.0635	4.09001	3.89433	4.01078	4.09508	4.09339	4.13668	3.94205	3.78136	4.14078
Gh_A13G1770	0	4.54844	5.0955	4.50144	3.64731	4.44427	3.74739	4.60348	4.66789	4.80684	3.80012	4.11853	4.55582
Gh_A05G0101	0	2.54844	4.01167	3.87086	2.68257	4	2.28983	3.29719	2.61824	3.19849	3.59216	2.63459	2.76341
Gh_D06G0537	0	2.26903	3.62059	4.59276	3.17313	4.1102	3.47638	2.49313	2.72901	3.08916	3.05311	2.51602	3.05658
Gh_A05G3960	0	2.13422	1.54102	0	1.65076	1.65992	2.91456	2.57773	2.33342	2.26903	2.21101	2.70044	3.01257
Gh_A06G0483	0	1.66448	2.43829	1.76129	0.565597	1.4957	1.70929	4.04614	2.70487	2.6017	0.863938	2.01436	2.05311
Gh_D04G2019	0	1.57531	2.33628	2.99639	2.12433	3.14241	2.87971	3.21568	2.48027	3.23726	2.50335	3.08236	2.68032
Gh_A04G1077	0	0.799087	1.76129	2.43296	1.26903	1.68706	2.37851	3.16993	2.53356	1.63691	1.09761	2.63227	3.32048
Gh_A11G1257	0	3.15056	2.76977	1.90689	3.18745	3.59932	3.45681	2.64847	3.23726	3.01078	3.07039	2.32481	2.40327
Gh_D12G0886	0	2.67807	3.26454	3.08916	3.26604	2.58015	2.43296	2.76553	3.18428	2.99277	2.7845	3.29278	2.58976
Gh_D11G1406	0	2.63923	1.68706	2.70487	2.65992	1.76977	2.36457	2.9855	1.99277	3.20006	3.0993	2.32769	2.44626
Gh_A12G0762	0	2.02148	2.48027	1.82375	1.56071	1.73118	2.16027	1.94486	2.36737	1.78241	1.38405	2.34767	1.53605
Gh_A01G1470	0	1.29278	0.389567	2.44361	1.20789	3.26454	3.02503	2.36737	2.17951	2.87578	1.65535	2.02857	1.46467
Gh_D08G0518	0	-0.68966	0	0	-0.68966	0.0565835	-1.39593	0.948601	0.790772	0.15056	0.432959	1.11103	1.15056
Gh_A08G0430	0	0	0	0	-0.136062	0	0.344828	0.31034	-1.78588	-1.2863	0	1.03562	-0.434403
Gh_A05G1575	0	0	-1.8365	0.604071	0.604071	0.443607	1.76129	1.53107	1.57531	1.05658	1.25701	1.51602	0.137504
Gh_D05G1753	0	-2.32193	-1.78588	0.575312	0.604071	1	-0.358454	1.67356	-0.136062	0.189034	0.799087	0.15056	-0.736966
Gh_D02G0408	0	0.137504	0	0.475085	0	0	0	-0.621488	0	0	-1.05889	-1.32193	0
Gh_D01G1707	0	0	-1.94342	0	-1.59946	0	0	-1.78588	-1.25154	-2.55639	0	-1.35845	0
Gh_A02G0345	0	-1.47393	0	0	0	0	0	0	0	0	0	0	-1.88897
Gh_A11G0507	0	0	0	0	0	0	0	0	0	0	0	0	0
Gh_A11G2262	0	0	0	1.28096	0	0	0	0	0	0.0565835	-0.785875	0.992768	0
Gh_D01G0359	0	-2.18442	0	0	0	0	0	0	0	0	0	0	0
Gh_D03G1718	0	0	0	0	0	0	0	0	0	0	0	0	0
Gh_D11G0585	0	0	0	0	0	0	0	0	0	0	0	0	0
Gh_D11G2569	0	0	0.669027	0	-0.0892673	0	0.62293	0	0	0	0	0	0
Gh_Sca129121G01	0	0	0	0	0	0	0	0	0	0	0	0	0

## Sheet: salt
Table S5: RNA sequence data for the upland cotton Alba genes profiled under salt stress conditions
	CK	Lf Salt 1h	Lf Salt 3h	Lf Salt 6h	Lf Salt 12h	St Salt 1h	St Salt 3h	St Salt 6h	St Salt 12h	Rt Salt 1h	Rt Salt 3h	Rt Salt 6h	Rt Salt 12h
Gh_D05G0083	0	3.81967	2.7866	3.4957	2.88947	4.01167	3.16189	4.03562	3.82069	3.32193	4.66505	4.58316	1.50215
Gh_D08G2460	0	4.89191	4.70874	3.58256	4.74685	4.36667	4.77505	4.58256	4.57954	4.57531	4.62936	4.96116	4.99005
Gh_D01G0922	0	5.14486	4.73335	4.80941	4.39643	5.12722	4.76977	5.27873	5.30049	4.80529	4.42156	5.01257	3.77716
Gh_A01G0884	0	4.82222	4.54164	4.29793	4.64155	4.85	4.49761	5.09043	4.91886	4.59872	4.44162	4.75435	4.76341
Gh_D03G0593	0	3.75702	3.66562	3.09592	3.67356	4.23419	4.16269	3.72901	3.78241	3.58135	4.50843	3.36036	4.58616
Gh_D13G2120	0	4.4522	5.01569	4.78503	4.65306	5.1469	4.91169	4.34483	4.87431	4.75114	4.32265	3.81455	3.904
Gh_A08G2091	0	3.02326	3.57168	3.5008	3.34908	3.63691	3.91073	4.24184	4.28392	3.83188	4.45418	3.45286	3.88655
Gh_A13G1770	0	4.71973	3.76341	3.87086	3.83996	4.70984	4.54905	4.41819	4.38198	4.11686	3.69488	3.90881	3.80116
Gh_A05G0101	0	1.54597	2.89918	0.389567	2.91839	1.85997	3.44095	3.21412	3.10769	2.27798	3.77926	3.93452	3.96901
Gh_D06G0537	0	0.422233	3.96809	3.22342	3.39232	3.51349	3.66676	3.35473	2.95791	3.21257	3.69599	4.46597	1.04963
Gh_A05G3960	0	0	0.895303	0	2.97269	2.40871	1.39506	2.45154	2.59694	1.29278	3.74308	3.66448	2.83188
Gh_A06G0483	0	0.389567	1.28688	0	2.62761	2.40054	1.76553	2.87381	2.01792	1.32193	3.54473	3.27053	4.03474
Gh_D04G2019	0	2.6017	2.34199	2.46467	1.46989	2.58015	2.36177	2.96717	2.91648	2.28983	2.94298	2.52105	0
Gh_A04G1077	0	2.10434	2.38681	2.774	2.72247	2.30743	1.70929	2.54597	2.43296	2.53356	3.30305	3.0036	0.432959
Gh_A11G1257	0	3.12433	3.36737	2.45418	1.7137	2.65764	2.85	3.28836	2.75275	2.80735	2.66221	3.53356	1.40599
Gh_D12G0886	0	2.48543	2.90689	3.26604	2.95047	2.93923	3.10769	2.77821	2.9486	2.93923	3.09255	2.63459	1.24489
Gh_D11G1406	0	3.41954	2.42761	2.81967	2.26303	2.57531	2.49057	2.36457	2.82985	2.81558	2.61117	3.62176	0.464668
Gh_A12G0762	0	2.32481	1.41684	2.09761	1.74416	1.86394	2.02503	2.08066	1.82375	1.94486	1.93734	2.24184	1.81558
Gh_A01G1470	0	2.0036	0.799087	1.5509	0.176323	1.81147	1.53605	2.78869	2.12763	1.30451	2.07724	0.594549	0.298658
Gh_D08G0518	0	0.831877	1.12433	-0.415037	0.722466	-0.785875	-1.68966	0.356144	0.782409	0.678072	0.201634	0.823749	0.367371
Gh_A08G0430	0	0.111031	-0.104697	-0.68966	-0.785875	-0.736966	-2.12029	-0.514573	-0.304006	-0.304006	-0.0291463	0.948601	-1.12029
Gh_A05G1575	0	-0.0892673	0.941106	1.1177	0.475085	0.565597	-0.251539	1.41684	1.08406	0.695994	0.0285692	-0.0740006	-0.321928
Gh_D05G1753	0	-0.0892673	-0.415037	0.411426	0.31034	-0.120294	-0.184425	0.790772	0.201634	0.0976108	1.30451	-0.0439433	0.124328
Gh_D02G0408	0	0.189034	0.0840643	0	0	0	-0.666576	-2.64386	-2.18442	-0.862496	0	-1.64386	-0.434403
Gh_D01G1707	0	0	0	0	-1.8365	-2.32193	-2.73697	-2.47393	-2.8365	-3.8365	-2.94342	0	0
Gh_A02G0345	0	0	0	-1.05889	-1.78588	0	-3.47393	0	-3.8365	-2.39593	0	0	0
Gh_A11G0507	0	0	0	0	0	0	0	0	0	0	0	0	0
Gh_A11G2262	0	0	0.321928	0	0	-1.55639	-0.68966	0	-0.136062	-0.810966	0.163499	0	0
Gh_D01G0359	0	0	0	0	0	0	-4.05889	0	0	0	0	0	0.111031
Gh_D03G1718	0	0	0	0	0	0	0	0	0	0	0	0	0
Gh_D11G0585	0	0	0	0	0	0	0	0	0	0	0	0	0
Gh_D11G2569	0	-0.120294	-0.810966	0	-1.152	-1.51457	-0.643856	-1.35845	0	-1.02915	0	0	0
Gh_Sca129121G01	0	0	0	0	0	0	0	0	0	0	0	0	1.0635
